# Supplementary material for: Inactivation of Hippo pathway characterizes a poor-prognosis subtype of esophageal cancer
Source: JCI journal article supplement (doi:10.1172/jci.insight.155218), 2022-08-21
Supplement: sd1 [file 1]

# Catalogue

|    |                                                                                                                                                             |    |
|----|-------------------------------------------------------------------------------------------------------------------------------------------------------------|----|
| 1  | Supplementary methods.....                                                                                                                                  | 2  |
| 2  | Sample selection .....                                                                                                                                      | 2  |
| 3  | Follow up of patients and collection of clinical data .....                                                                                                 | 2  |
| 4  | Gene panel design and sequencing .....                                                                                                                      | 2  |
| 5  | Data generation of validation cohort.....                                                                                                                   | 3  |
| 6  | Tumor purity determinant.....                                                                                                                               | 3  |
| 7  | Reads alignment and Variant calling.....                                                                                                                    | 3  |
| 8  | Detection of significantly mutated genes .....                                                                                                              | 4  |
| 9  | Sanger sequencing .....                                                                                                                                     | 4  |
| 10 | Analysis of copy number alterations .....                                                                                                                   | 5  |
| 11 | Oncogenic mutation annotataion.....                                                                                                                         | 5  |
| 12 | Inference of temporal order of oncogenic mutations .....                                                                                                    | 5  |
| 13 | Estimation of cancer cell fraction .....                                                                                                                    | 6  |
| 14 | Unsupervised machine learning.....                                                                                                                          | 6  |
| 15 | Analysis of external datasets .....                                                                                                                         | 6  |
| 16 | Analysis of drug response for different ESCC subgroups .....                                                                                                | 7  |
| 17 | Statistical analysis.....                                                                                                                                   | 7  |
| 18 | RNA extraction, reverse transcription and quantitative PCR.....                                                                                             | 8  |
| 19 | Cell Lines and Culturing.....                                                                                                                               | 8  |
| 20 | Small Interfering RNA Mediated Gene Knockdown .....                                                                                                         | 8  |
| 21 | Overexpression of Truncated protein of FRY .....                                                                                                            | 8  |
| 22 | Western Blotting.....                                                                                                                                       | 9  |
| 23 | Cell Proliferation Assays.....                                                                                                                              | 9  |
| 24 | Immunohistochemistry staining and digital analysis.....                                                                                                     | 9  |
| 25 | Supplementary figure .....                                                                                                                                  | 10 |
| 26 | Figure S1 Diagram of samples selection workflow. ....                                                                                                       | 11 |
| 27 | Figure S2 Overview of our analysis schedule .....                                                                                                           | 11 |
| 28 | Figure S3 Lollipop of frequently mutated genes.....                                                                                                         | 12 |
| 29 | Figure S4 Correlations of expression of several Hippo-associated genes and FRY in three microarray datasets.....                                            | 13 |
| 30 | Figure S5 Association of the three-gene signature with patient prognosis.....                                                                               | 16 |
| 31 | Figure S6 Survival curves of patients according to three-gene signature stratified by clinicopathological parameters.....                                   | 16 |
| 32 | Figure S7 Comparisons of the sensitivity and specificity for prediction of disease progression and death by the three-gene signature and the TNM stage..... | 17 |
| 33 | Figure S8 Prognostic value of the three-gene mutation signature detected by different methods in TCGA cohort. ....                                          | 17 |
| 34 | Figure S9 Representative images of CD8 immunohistochemistry of ESCC tissues from FAT/FRY mutant and wild type patients.....                                 | 18 |
| 35 | Figure S10 FAT/FRY signature is prognosticator instead of predictor of ajuvant therapy.....                                                                 | 18 |
| 36 | Figure S11 Prognostic value of genomic and transcriptomic features of FAT/FRY subgroup tumors .....                                                         | 19 |
| 37 | Table S1 Detailed comparison of clinical variables between discovery cohort and independent validation cohort .....                                         | 20 |
| 38 | Table S5 Multivariable Cox regression analysis of the three-gene signature and clinicopathological factors.....                                             | 21 |
| 39 | Table S6 Detailed comparison of clinical variables between "FAT/FRY" group and wild type group across the 271 ESCC patients.....                            | 22 |
| 40 | Table S8 Publicly-available gene signatures used in the study.....                                                                                          | 23 |

## Supplementary methods

### Sample selection

All the samples in our study came from surgical specimens were stored at  $-80\text{ }^{\circ}\text{C}$  in the biobank of Sun-Yat Sen University Cancer Center. All patients underwent esophagectomy, achieved complete resection without receiving neoadjuvant therapy and experienced lymph node metastasis. 201 fresh frozen samples were chosen following our established criteria (Figure S1).

Inclusion criteria contained:

- (1) Patients whose age  $\geq 18$  years, preoperative KPS score  $\geq 90$ ;
- (2) Pathological diagnosis as esophageal squamous cell carcinoma and tumor located in thoracic segment of esophagus;
- (3)  $R_0$  resection via thoracic approach and standard lymph node excision;
- (4) Neo-adjuvant treatment naïve;
- (5) Patients with lymph node metastasis confirmed by pathological diagnosis

Exclusion criteria contained:

- (1) Patients with secondary primary tumor;
- (2) Patients died within 30 days after surgery or died of post-operation complication;
- (3) Patients missing essential clinical information, such as age, sex, operation record, pathological diagnosis and follow-up data.
- (4) Patients with distant metastasis by PET-CT.

### Follow up of patients and collection of clinical data

Patients were followed up through regular outpatient service four times per year within the first year after surgery, twice per year from the second to the fifth year, and once a year after five years. Regular examination included physical examination, blood and biochemical routine examination, tumor biomarker (SCC and CEA), endoscopy and CT. Demographic and clinical data were extracted from our clinical database.

Clinical endpoint data was prepared following the common used criteria[1]. Disease free survival (DFS) is defined as the shortest period from the date of surgery to the date of first tumor recurrence event with radiological or pathological confirmation. The censored time is from the date of surgery to the last contact date or date of death. Overall survival (OS) is the longest period from the date of surgery until the date of death at any cause. The censored time is from the date of surgery to the date of last contact. Comprehensive pathological staging was conducted by experienced pathologists following the 8<sup>th</sup> edition of AJCC cancer staging manual.

### Gene panel design and sequencing

Mutation data were downloaded from supplementary materials of published result[2-9]. We calculated mutation frequency for each gene based on WGS/WES data from 589 patients. In order to gain in-depth insight of mutations of ESCC, we brought genes with mutation frequency above 2%

86 into our panel list. Ultimately, all exons of 548 selected genes covering 5.731 Mbp were used to  
87 design complementary probes for library construction.

88 AllPrep DNA Universal Kit (SureSelect, Agilent, Santa Clara, USA) was used to extract DNA  
89 from frozen fresh tissues (purity>50%, median: 70%). DNA was quantified and quality controlled by  
90 Qubit 2.0 and Agarose gel electrophoresis assay prior to library construction. DNA was broken into  
91 180-280 bp and all exons of 548 genes were captured using Agilent SureSelect XT Custom Kit.  
92 After PCR amplification and quality control by Agilent 2000, DNA library was sequenced using  
93 paired-end 150 bp on Illumina Hiseq platform. The average sequencing depth of coverage on target  
94 regions was 1070X (range: 690X—1616X), and 95% of targets were covered by 100 reads.

## 95 Data generation of validation cohort

96 To verify the prognostic value of our findings, an independent cohort was recruited from the  
97 biorepository of Guangdong Esophageal Cancer Institute (GECI). The tumor samples of GECI  
98 were collected from thoracic division of Sat-Yat Sen University Cancer Center. Following the same  
99 inclusion and exclusion criteria used in discovery cohort, 70 samples with qualified frozen tissues  
00 were selected from 335 cases in our biorepository. Detailed comparison of clinical information  
01 between 201 patients in discovery cohort and 70 patients in validation cohort was listed in Table S1.  
02 Univariable Cox regression was performed with 2000 bootstrap sampling in discovery cohort, and  
03 66 genes associated with DFS or OS were included in the sequencing panel of validation cohort.  
04 The design of captured probe and library construction of samples were identical to those applied in  
05 discovery cohort. DNA library was sequenced using paired-end 150 bp on Illumina Hiseq 2500  
06 platform. The median coverage of depth in validation cohort was 1026X (range: 515X-1648X). The  
07 clean data of validation cohort was then processed following the same bioinformatic analysis  
08 pipeline.

## 09 Tumor purity determinant

10 All samples underwent pathological review via frozen section. A tissue section was created  
11 with two H&E slides (termed as top and bottom): a 4  $\mu$  m frozen section (top slide) was cut, 20 mg  
12 of tumor tissue was shaved from the tissue for library construction, then a second 4  $\mu$  m frozen  
13 section was cut (bottom slide). An H&E stain was conducted on both slide tissue sections.  
14 SYSUCC-authenticated pathologist conducted diagnosis verification and tumor purity  
15 assessment. Pathologist initially screened the slide in low magnification to determine the  
16 microscopic morphology, then magnified to 20X and reviewed 10 representative fields on each slide.  
17 The tumor purity was derived from the proportion of tumor nuclei compared to total nuclei present  
18 on the slide. The tumor purity of each sample was the average level of purities in both top and  
19 bottom slides. For quality control, random review of 20% of slides was conducted by a second  
20 pathologist to confirm the results. If the results of second review were off by 10%, the sample  
21 would be assessed again.

## 22 Reads alignment and Variant calling

23 Clean reads were obtained after filtering out low-quality reads and adapters from raw reads. The  
24 clean reads were aligned to human reference genome b37 using BWA[10] and deduplicated using  
25 SAMBLASTER[11]. Variants (SNVs and small Indels ) were identified using Mutect2 by comparing  
26 tumor samples with an unmatched normal sample pool[12]. All putative variants were annotated

27 using ANNOVAR[13]. To account for the absence of matched control, a custom variant sifting  
28 pipeline was developed:

29 (1) Removal of variants located within low-coverage (<10X) regions and variants with less than  
30 3 mutant reads

31 (2) Removal of variants whose allele fraction is 1

32 (3) For variants with well-characterized annotation in COSMIC[14], removal of known  
33 polymorphisms reported among 1000 Genome, Exome Aggregation Consortium data[15] or  
34 in-house database at frequency >0.1

35 (4) For variants without annotation in COSMIC, removal of variants recorded in dbSNP, variants  
36 with frequency above 0.003 in 1000 Genome data, variants with frequency above 0.01 in in-  
37 house database and variants with frequency above 0.001 in Exome Aggregation Consortium  
38 data

39 (5) Removal of germline variants present in any of normal control.

40 After filtering the probably germline variants, the remaining mutations were used for further  
41 analysis in our study.

## 42 Detection of significantly mutated genes

43 According to Darwinian evolution, mutations that endowed tumor cells survival advantage will  
44 accumulate during tumor development. Following this principle, we statistically evaluated three  
45 types of features extensively observed in driver genes: 1) mutation recurrence; 2) deleterious  
46 mutation enrichment; 3) Mutation hotspots. The methodological details were as follow[3].

47 (1) Mutation recurrence test.

48 To test whether mutations in a gene frequently occurred across sample,  
49 OncoDriveCLUST was employed to evaluate mutation recurrence while considering gene  
50 length, distribution of mutations across gene loci and background mutation rate[16].

51 (2) Deleterious mutation enrichment test.

52 A genuine driver gene is prone to undergo mutational hits that damage the protein  
53 function than non-driver gene does. In this study, nonsense, frameshift, splice site mutations  
54 and missense mutations scored under 0.05 by SIFT[17] were considered deleterious to  
55 protein function. For each gene, we assumed the numbers of deleterious mutations and all  
56 mutations as the number of successes and trials, respectively. Then we constructed a  
57 binomial model to evaluate the enrichment of deleterious mutation. As for the probability in  
58 binomial model, we used the ratio of deleterious mutations to all mutations in non-recurrently  
59 mutated genes.

60 (3) Mutation cluster

61 Mutational hotspot is a strong indicator of positive selection[18]. Rather than nucleotide-  
62 level analysis, we applied an algorithm to detect amino acid residue-level hotspots[19].  
63 Hotspot in the algorithm was defined as an amino acid position in protein-coding gene  
64 mutated more frequently, corresponding to mutations located in the same codon.

65 Several significant mutated genes were identified at the threshold of  $adj.P_{OncoDriveCLUST} \leq 0.1$   
66 and  $P_{binomial} \leq 0.05$ : TP53, FRY, ZNF750, NFE2L2, GRIN2B and FCGBP.

## 67 Sanger sequencing

68 110 mutations were randomly selected for validation. Because common detection threshold of  
69 mutations by Sanger sequencing is 10% of VAF[20, 21], we filter 59 mutations with a frequency of  
70 over 10%. Among these mutations, 3 cases were failed due to difficulty of PCR amplification. Finally,

71 Sanger sequencing succeed in 56 cases. 98.2% (55/56) of mutations detected by NGS were verified  
72 by Sanger sequencing. Mutations of FRY gene in cell lines were also detected by Sanger  
73 sequencing. Sequences of primers would be available upon request.

## 74 Analysis of copy number alterations

75 Copy number analysis was conducted using CNVkit[22] which was designed specific for  
76 targeted sequencing data. In brief, the read counts of 50 normal samples were normalized and  
77 integrated into a pool reference. Then targeted reads and nonspecifically captured off-target reads  
78 from tumor samples were used to infer somatic copy number alterations. The algorithm also adjusted  
79 the bias that leads to sequencing read depth: GC content, target size, repetitive sequences. Copy  
80 number alterations (CNAs) were inferred following default parameters and adjusted by tumor purity.

## 81 Oncogenic mutation annotataion

82 Each somatic mutation was annotated as oncogenic or unknown. Detailed annotation  
83 parameters are listed as follows, which is similar to the criteria of oncogenic mutation in published  
84 works[23, 24]:

### 85 (1) Oncogenic

- 86 a. Known oncogenic mutations reported in the literature[2-9, 14, 25-29];
- 87 b. Hotspot mutations ( $n \geq 3$ ) that located in known cancer associated genes;
- 88 c. Truncating variants (nonsense mutations, splice site mutations, nonstop mutations and  
89 frameshift insertions or deletions) in cancer associated genes;

### 90 (2) Unknown

- 91 a. Mutations outside of frequent oncogenic mutations in genes with known oncogenic  
92 mutations;
- 93 b. Mutations in genes whose role in ESCC is not established yet.

## 94 Inference of temporal order of oncogenic mutations

95 The mutation order analysis was conducted using the previous described methods[23, 24].  
96 Before testing whether one mutation occurred earlier the others, the variant allelic frequency (VAF)  
97 of each oncogenic mutation was calibrated by copy number of loci at which mutations located  
98 according to the method described previously[30]. In brief, VAF of homozygous mutations and  
99 mutations of genes located on chromosome X in male cases were reduced to the half of the raw  
00 data. VAF of hemizygous mutations were recalculated based on the formula as “Adjusted  
01  $VAF = x / (1 + x)$ ”, while x refers to raw VAF. Adjustment was not required for heterozygous mutations.

02 To test whether there existed evidence that two oncogenic mutations within a patient were  
03 present in the same fraction of cells, we apply fisher exact test using the adjusted VAF. We set a  
04 significance threshold of  $P \leq 0.05$  at determining whether clonal heterogeneity existed in a given  
05 patient. Then we employed the “pigeonhole” principle to reconstruct temporal precedences of  
06 oncogenic mutations, only including those pair comarisons with clear phylogenetic relationship[31].  
07 From the set of genes in which at least 5 precedences were observed, we utilized Bradley-Terry  
08 model[32] (package: BraleyTerry2) using penalized maximum likelihood to the observed  
09 precedences[23, 24]. Quasi standard error was computed using ‘qvcalc’ package so that  
10 comparison between any pair of genes was readily made, not just the comparison with the reference  
11 gene.

## 12 Estimation of cancer cell fraction

13 Following the algorithm described previously[33, 34], we computed the posterior probability  
14 distribution over cancer cell fraction (CCF) of mutations to estimate their clone status. Let  $b$   
15 denoted the number of reads supporting such mutation,  $d$  denoted the total reads covering the  
16 mutation locus,  $\rho$  referred to the tumor purity,  $c_t$  and  $c_n$  referred to the copy number of the gene  
17 locus at that base in the tumor and normal genome respectively. The expected allele-fraction  $f(c)$   
18 of a mutation present in one copy in a fraction  $c$  of cancer cells was calculated by  $f(c) = c * \frac{\rho}{(1-\rho)c_n + \rho c_t}$ , with  $c \in [0.01, 1]$ . Then  $P(c) \propto \text{Binomial}(b, f(c))$  assuming a uniform prior on  $c$ . The  
19 distribution over CCF was obtained by calculating values over a regular grid of 100  $c$  values and  
20 normalizing. Mutations were classified as clonal on the ground of the probability that the CCF exceed  
21 0.85. A probability threshold of 0.5 was used in our study.

22 To infer the proportion of tumor cells carrying a given mutation, we used the following formula[31,  
23 35]:

$$24 \text{CCF} = \min\left(1, \frac{b}{d} * \frac{(1-\rho)c_n + \rho c_t}{\rho}\right)$$

## 26 Unsupervised machine learning

27 Prognosis related genes were selected as below for further clustering. To reduce false negative  
28 rate and enhance statistics power, two follow-up end points (DFS and OS) and a relatively loose  
29 significant threshold were used to generate gene-sample matrix. Log-rank test was applied to each  
30 mutated gene (mutant VS wild type), and all 59 prognosis-associated genes ( $P_{DFS} \leq 0.1$  or  $P_{OS} \leq$   
31  $0.1$  and frequency  $\geq 2\%$ ) were assembled into a binary gene-sample matrix. None of mutation in 59  
32 genes was observed in four patients, genomic data of these four patients was excluded from gene-  
33 sample matrix due to the mathematical constraints of nonnegative matrix factorization (NMF).

34 To dig out ESCC subgroups that shared similar mutational patterns associated with prognosis,  
35 NMF was used to cluster patients with similar mutation patterns (package: NMF). The number of  
36 cluster  $k=3$  was chose as it yielded a high cophenetic coefficient and effectively decomposed the  
37 matrix[36]. To examine the robustness of the above NMF-based clusters, another entirely different  
38 clustering algorithm, partitioning around medoids consensus clustering[37], was applied (package:  
39 ConsensusPlus). The number of clusters  $k=3$  was picked by inspecting the bimodality of CDF curves  
40 and progression of area under CDF curves[38]. Venn plot and Kappa index (package: irr) were  
41 used to evaluate and visualize the consistency of clusters identified by two algorithms.

## 42 Analysis of external datasets

43 To evaluate whether FRY was dysregulated in ESCC, paired t test was used to compare the  
44 mRNA levels of FRY in tumors and matched normal and paratumor tissues in three available ESCC  
45 datasets, GSE23400, GSE44021 and GSE161533. Three datasets were further merged and batch  
46 effects were adjusted using Limma package. To further discover the correlation of FRY and Hippo  
47 pathway, we calculated the spearman correlation coefficients of FRY and Hippo target genes.  
48 Taking advantage of the reverse-phase protein arrays (RPPA) data from the TCGA project, we  
49 measured the relationship of FRY and YAP1, the only protein of Hippo pathway in the RPPA.

50 To validate the prognostic value of our three-gene signature, two independent datasets were  
51 used to perform survival analysis[6, 39]. As for TCGA cohort, WES data were downloaded from

52 UCSC Xena. Mutations were called by “Muse”, “Mutect”, “SomaticSniper” and “Varscan”. Mutations  
53 only detect by more than two callers were used for further analysis. Patients were grouped according  
54 to their mutation status of FAT1, FAT3 and FRY. Notably, the lack of accurate N stage information  
55 in the TCGA cohort prevented us to further subdivide patients by status of their lymph node  
56 metastasis. Note that the prognostic value of the three-gene mutation signature was insensitive to  
57 choice of mutation callers (Figure S6). Similar analysis was performed in Song’s cohort[6], and  
58 patients were subdivided by their positive lymph node status compatible with our discovery cohort.

59 To further characterize molecular features of the “FAT/FRY” subtype, we performed multiomics  
60 analysis based on the data from TCGA and GSE47404. For transcriptome analysis, the read count  
61 data were transformed to TMM by the R package edgeR to identify differentially expressed  
62 genes[40]. For microarray data, differentially expressed genes was detected by package “limma”.  
63 We used gene set enrichment analysis to identify enriched pathways in the molecular subtypes  
64 (package: ClusterProfiler). To dissect the composition of tumor environment, we calculated the z-  
65 score of immune cells to represent their relative composition in ESCC micro-environment using  
66 package “GSVA” [41-43]. Briefly, this method could evaluated activities of pathway by automatically  
67 caught a subset of genes in the pathway whose combined expression delivers optimal  
68 discriminative power for the disease phenotype. Marker genes representing each immune cell  
69 subset could be sourced from published papers (Table S8).

70 To assess the capacity of our molecular subtypes to predict immunotherapy responses, we  
71 applied subclass mapping (SubMap) to measure the similarity of transcriptome profile of our  
72 molecular subtypes and that of the groups with different responses in the immunotherapy cohort.  
73 The SubMap algorithm evaluates the extent of commonality of the different subgroups in  
74 independent datasets. Permutation-based P-values were used to evaluate the similarity, and the  
75 lower the P-values were, the higher the similarity. We applied SubMap (GenePattern) to measure  
76 the similarity of ESCC molecular subtypes with different responses of patients from two melanoma  
77 cohorts and a urothelial cancer cohort treated with immune checkpoint inhibitors[44-46].

78 Furthermore, we evaluated the predictive capacity of FAT/FRY signature in immunotherapy  
79 cohorts. Due to the lack mature sequencing data of ESCC, we chose to perform survival analysis in  
80 a pancancer cohort with microsatellite stable (MSS) tumors and a NSCLC cohort as an  
81 alternative[47-49], because most of ESCC were MSS[50] and the genetic background of ESCC were  
82 similar to that of NSCLC[51].

## 83 Analysis of drug response for different ESCC subgroups

84 The drug response data (half maximal inhibitory concentration, IC50) of 22 ESCC cell lines with  
85 Cancer Cell Line Encyclopedia mutational profiling data were retrieved from Genomics of Drug  
86 Sensitivity in Cancer[52]. The higher IC50 indicated a more resistant phenotype of the cell. Student  
87 t test was used to compared drug responses of the FAT/FRY mutant cell lines and those with wild  
88 type.

## 90 Statistical analysis

91 All analyses were performed in R 4.0.2 and SPSS 25.0 (IBM Corporation). The P value for the  
92 survival curve was calculated from the log-rank test. Student’s t test or the Wilcoxon rank-sum test  
93 was used to test for an association between two groups of continuous variables as appropriate.  
94 Paired t test was used to compare the mRNA levels of FRY in tumors and matched normal tissues  
95 in three available ESCC datasets, GSE23400, GSE44021 and GSE161533. Fisher’s exact test was

used to test for an association between categorical variables, including determining whether the oncogenic mutations of cancer-associated genes had a bias towards being “clonal”. Clonal events were deemed early events and subclonal events were acquired relatively later. The fixed ( $I^2 < 50\%$ ) or random effects ( $I^2 \geq 50\%$ ) model was used to pool the HR of the molecular subgroup from three cohorts using “meta” package. We performed area under the curve (AUC) for the receiver operating characteristic (ROC) analysis to compare sensitivity and specificity for prediction of death and relapse at different cutoff times (2, 3 and 4 years) by our molecular subgroups and the AJCC 8<sup>th</sup> TNM stage using “timeROC” package. Similar analysis was performed to compare the performance of the three-gene signature and TMB in predicting post-immunotherapy outcome. All P values reported are two-sided. The P value threshold for statistical significance was set at 0.05. Several packages, including “ggplot2”, “ggsci”, “ggtheme”, “survival”, “maftools”, “trackviewer”, “GridExtra” and “VennDiagram” was used for data visualization. To visualize the mutation profile of genes, the protein sequence annotations were downloaded from Uniprot database (<https://www.ebi.ac.uk/prot eins/api/>).

## RNA extraction, reverse transcription and quantitative PCR

Among the 201 patients in the discovery set, 90 fresh frozen tumors were available. Reasons for the absence of samples included the exhaustion of samples and prohibition of obtaining samples from the biobank due to their age. Total RNA was extracted from clinical samples using TRIzol reagent (Invitrogen) according to the manufacturer’s instruction. cDNA was synthesized from 1  $\mu$ g of total RNA using RevertAid First Strand cDNA Synthesis Kit (Thermo Scientific). cDNA was subjected to quantitative real-time PCR (qRT-PCR). GAPDH was used as an internal control. The primers used in this study are shown in Table S11. QRT-PCR was performed using the Power SYBR Green PCR Master Mix (Applied Bio systems) and LightCycler480 PCR system (Roche Diagnostics).

## Cell Lines and Culturing

Human ESCC cell lines KYSE30, KYSE410 were all preserved in State Key Laboratory Of Oncology In South China. All of these cells were cultured in DMEM medium supplemented with 10% fetal bovine serum and 1% antibiotics (100 mg/mL streptomycin and 100 units/mL penicillin) at 37 °C in a humidified incubator under 5% CO<sub>2</sub> condition.

## Small Interfering RNA Mediated Gene Knockdown

Depletion of gene expression was performed by transfecting cells with small interfering RNA (siRNA) oligonucleotides directed against the following target sequences: FRY-si1 : GCAGGACCCTTCAGCATTA; FRY-si2: GCTACA ACTACTTCGAATT. Transfection steps were performed following the manufacture’s protocols, using Lipofectamine RNAiMAX (Invitrogen, USA).

## Overexpression of Truncated protein of FRY

The plasmid containing human partial length FRY cDNA (1-957) was amplified by PCR and cloned into pcdna3.1 vector and linked with a HA tag at the N-terminal. Transfection steps were performed following the manufacture’s protocols, using Lipofectamine 3000 (Invitrogen, USA)



## 33 Western Blotting

34 Cell lysate was prepared using a RIPA Lysis Buffer (Millipore, USA), and the protein  
35 concentration was measured using a BCA Protein Assay Kit (keyGEN BioTECH, China). Cell lysates  
36 were separated by 6%–10% sodium dodecyl sulfate (SDS)– polyacrylamide gel electrophoresis  
37 (PAGE) gel electrophoresis and transferred to a PVDF membrane. After blocking with 5% skim milk,  
38 the membrane was incubated with one of the following primary antibodies under 4 °C overnight: FRY  
39 (LS-C343004, mouse; LSBio, Germany), HA (3724, rabbit; CST, USA), Vinculin (13901, rabbit; CST,  
40 USA), Tubulin (3873, mouse; CST, USA), and then incubated with the species-specific secondary  
41 antibodies for one hour under room temperature. Finally, the membrane was incubated with Western  
42 Blotting Substrate (Thermo Scientific, USA) and detected by ChemiDoc Touch imaging system  
43 (Biorad, USA).

## 44 Cell Proliferation Assays

45 For cell viability assay, cells were seeded into a 96-well plate at 10<sup>3</sup> cells per well and cultured  
46 at 37 °C. For each day, 10% (volume/volume) CCK-8 (Dojindo, Kumamoto, Japan) was added to  
47 the culture medium and incubation lasted for 1 hour. Cell viability was monitored by measuring  
48 absorbance at 450 nm using a Microplate Reader (MD SpectraMax PlusPower 384, USA). The  
49 experiment was performed in quintuplicate and repeated twice.

## 50 Immunohistochemistry staining and digital analysis

51 Previous immunogenomic analyses from both TCGA-ESCC and GSE47404 datasets show that  
52 CD8+ tumor infiltrated lymphocytes (TILs) were more abundant in FAT/FRY mutant ESCC.  
53 Therefore, immunohistochemistry(IHC) analysis was performed for CD8 (ZA-0508-3.0, ZSGB-BIO)  
54 to evaluate the CD8+ TIL infiltrations of 170 patients with available tumor tissue slides from the  
55 discovery cohort. Reasons for absence of tumor slides included exhaustion of FFPE slides and  
56 absence of tumors in the slides. Polaris digital slides scanner (Akoya Biosciences, USA) was used  
57 to scan the slides and HALO digital pathological platform was used to quantify the density of CD8+  
58 cells. The tumor regions were manually annotated by an experienced pathologist and the RGB  
59 signal of the immunostaining markers was recognized by the multiplex IHC mode of HALO software  
60 and the cutoff of the signal was calibrated by the author (MZH). The positive cell densities of the  
61 tumor area was calculated as the number of positive cells divided by the tumor area measurements  
62 (cell counts/mm<sup>2</sup>). The proportions of CD8+ cells were also calculated to parallelly evaluate the  
63 abundance of CD8+ TILs, which was not affected by the size of annotated areas. Wilcoxon rank  
64 sum test was performed to compare the density of CD8+ cells between FAT/FRY mutant and wild  
65 type tumors.

66 **Supplementary figure**

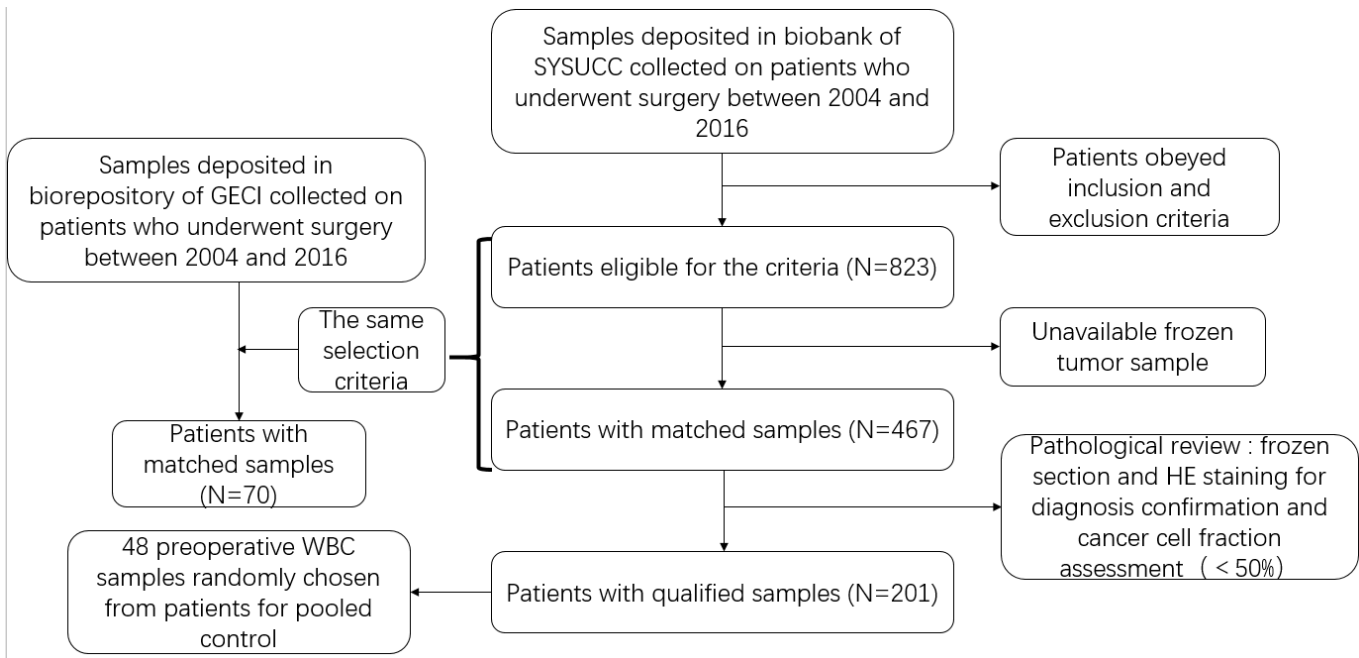

68 Figure S1 Diagram of samples selection workflow. Patients in discovery and validation  
 69 cohorts were selected by the same criteria.

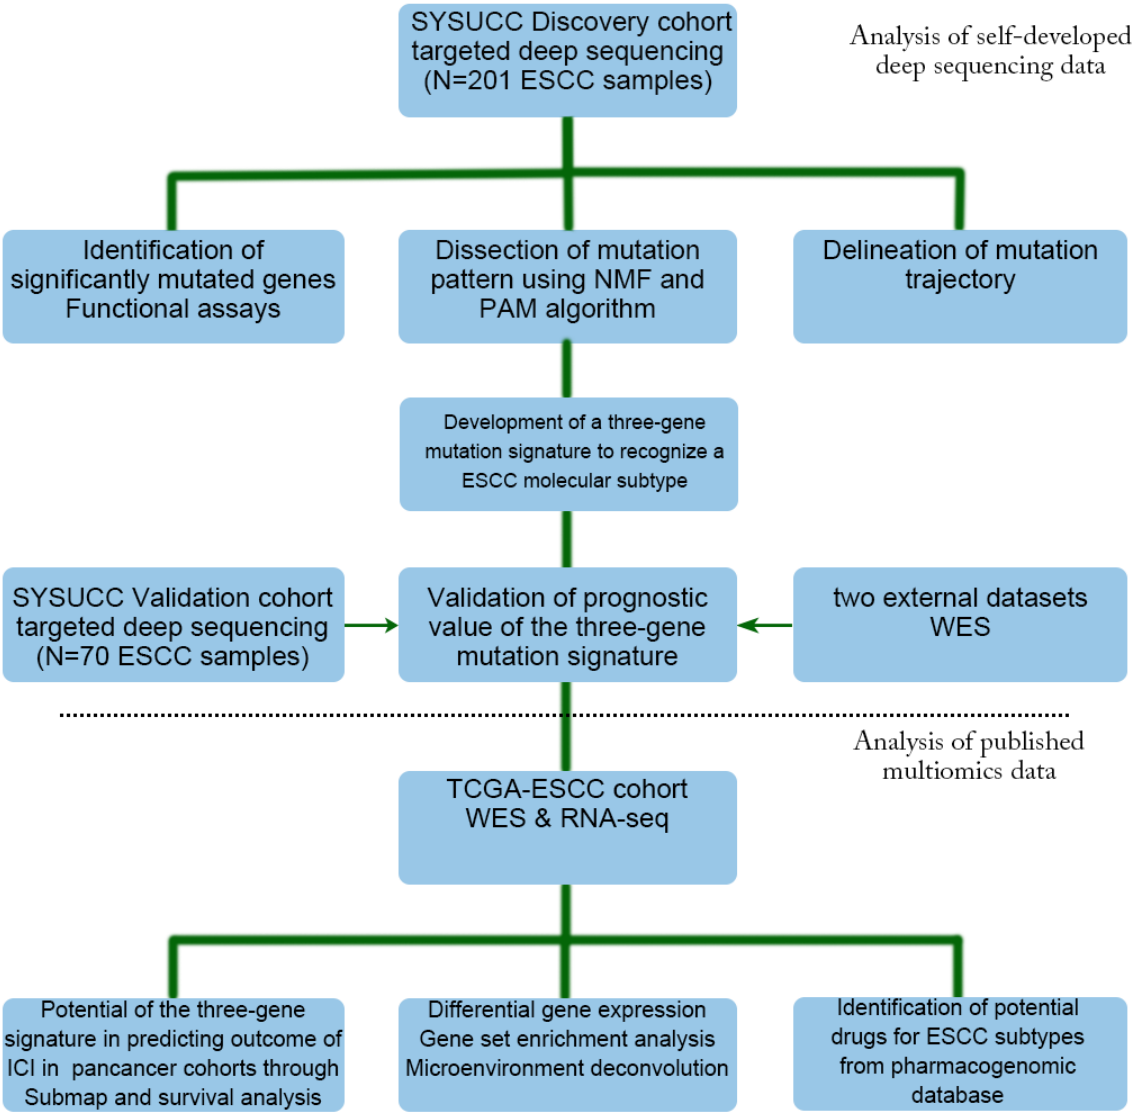

71 Figure S2 Overview of our analysis schedule

72  
73

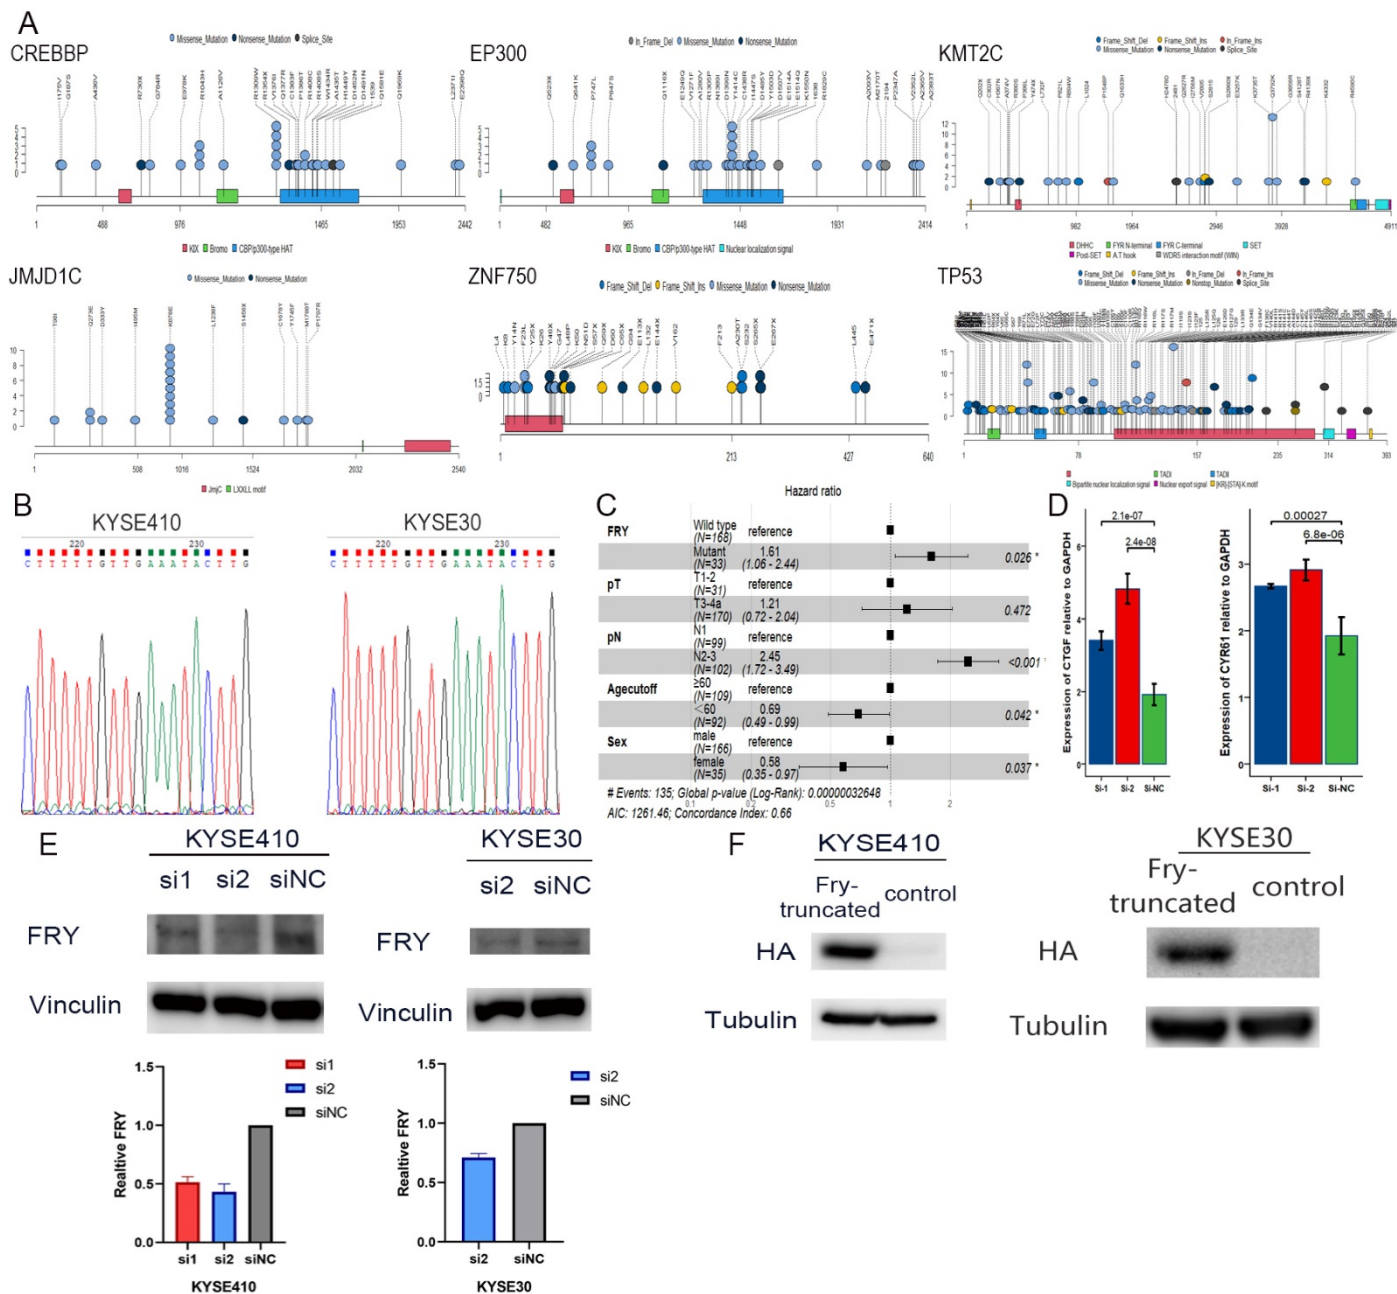

74  
75 **Figure S3 Lollipop of frequently mutated genes.** (A) Mutational hotspots accumulated in  
76 ESCC associated genes, including histone modifiers EP300, CREBBP, KMT2C and JMJD1C. (B)  
77 Sanger sequencing identified somatic mutations of FRY in ESCC cell lines. No FRY mutations  
78 were detected in KYSE410 and KYSE30 cell lines. (C) Multivariable Cox regression analysis of  
79 mutation status of FRY and clinicopathological variables. (D) The mRNA levels of CTGF and  
80 CYR61 in two RNAi KYSE410 cells and the control KYSE410 cells. (E) Western blot and  
81 quantitative analysis of knock down efficiency of FRY in KYSE410 and KYSE30 cells. (F) Western  
82 blot analysis of overexpression of hotspot mutation FRY p.E319X. Data represent mean  $\pm$  SEM  
83 from 3 independent experiments and each had three replications

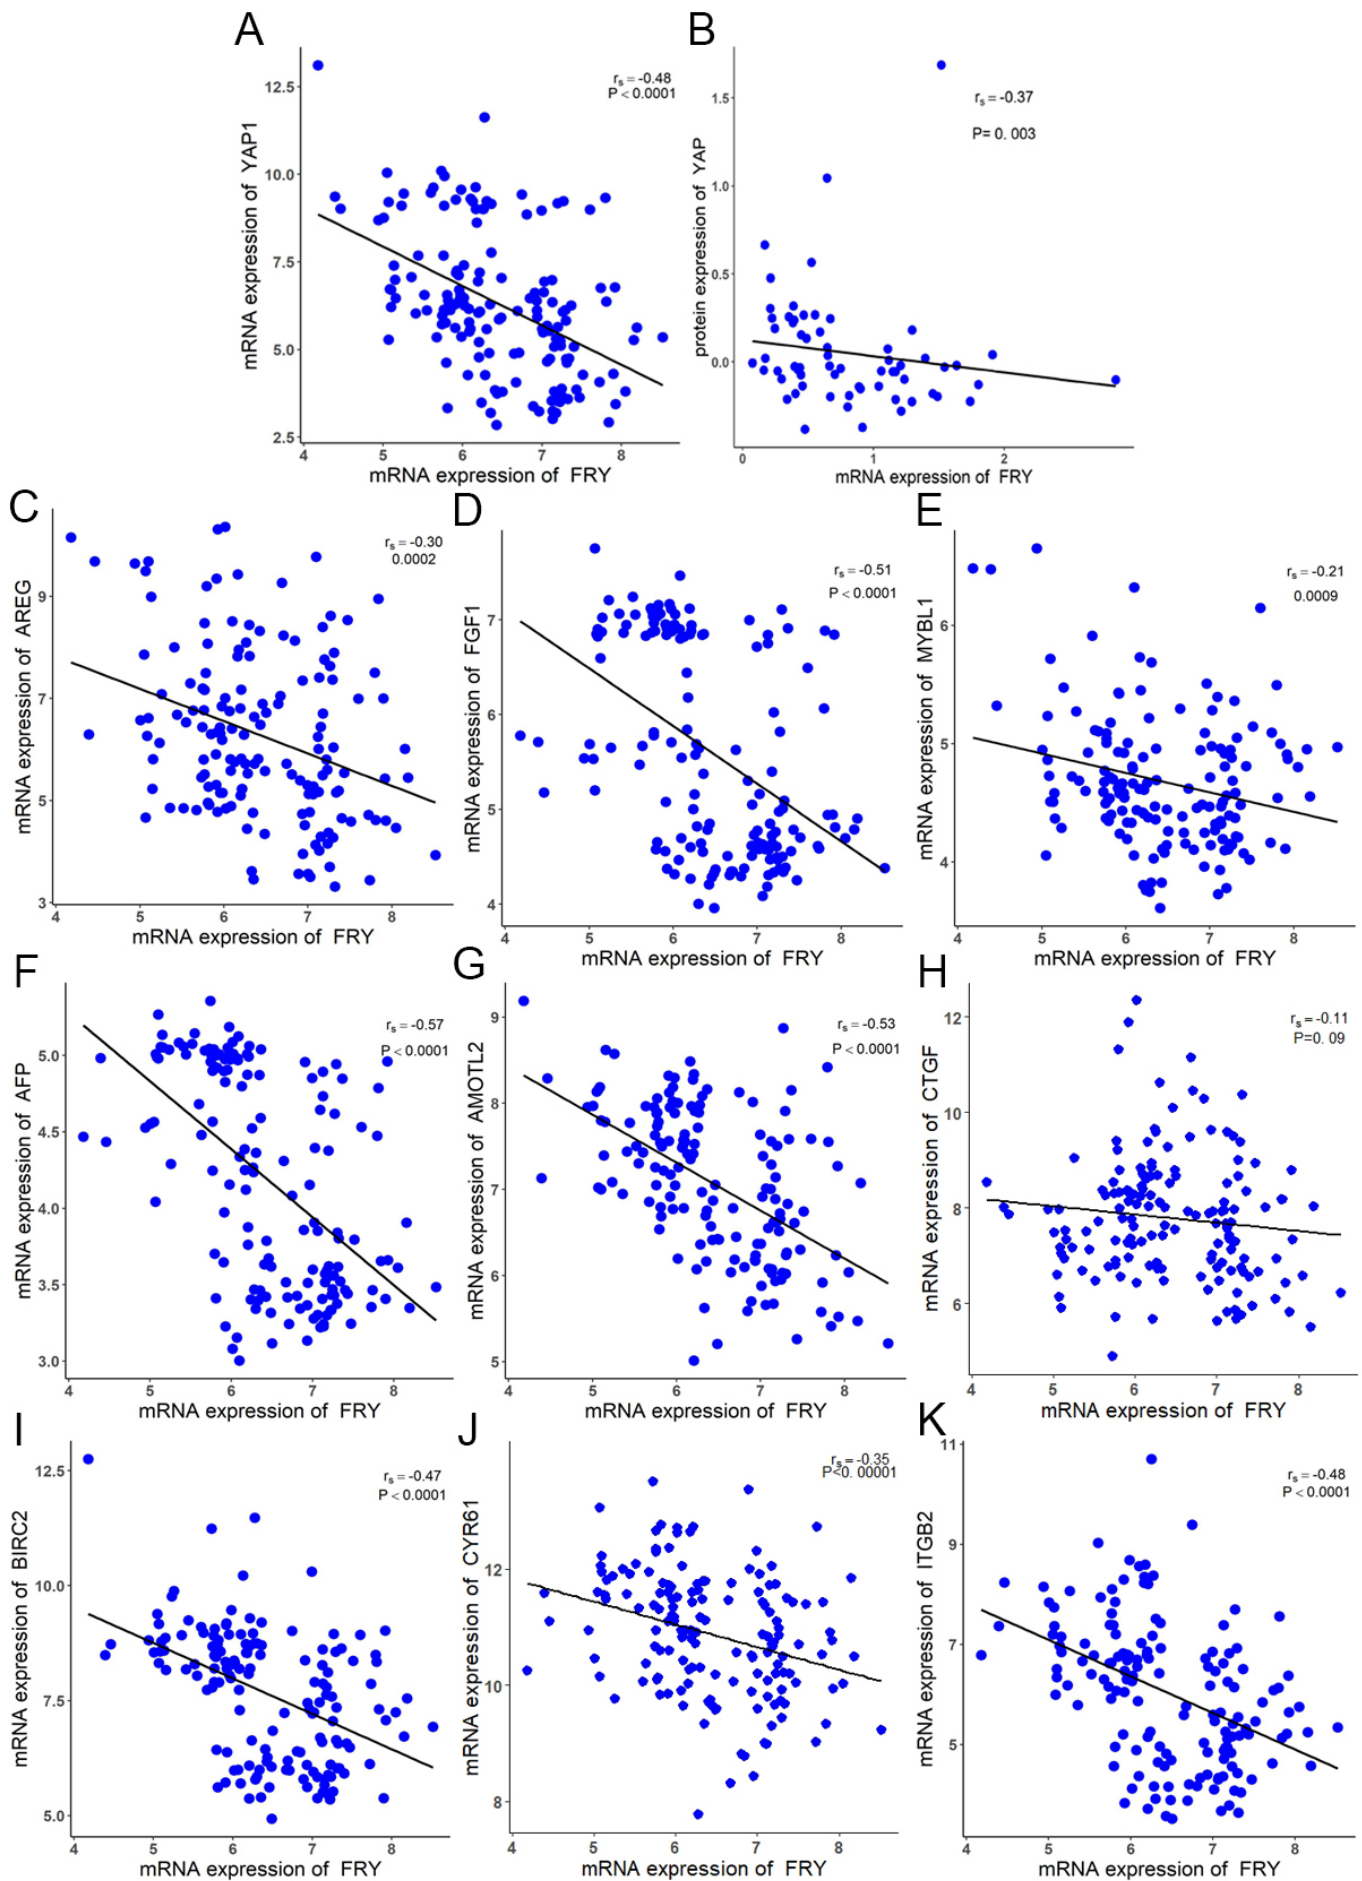

84

85 Figure S4 Correlations of expression of several Hippo-associated genes and

86 **FRY in three microarray datasets.** Negative correlation of FRY and YAP1 and its target  
87 genes in the combined microarray datasets (A, C-L). (B) Correlation of mRNA levels of FRY and  
88 protein expression of YAP1 in the TCGA-ESCC RPPA datasets.

### A SYSUCC discovery cohort

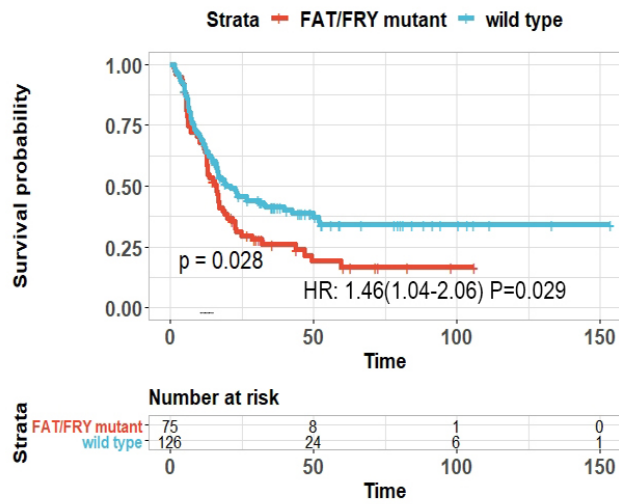

### B GECI validation cohort

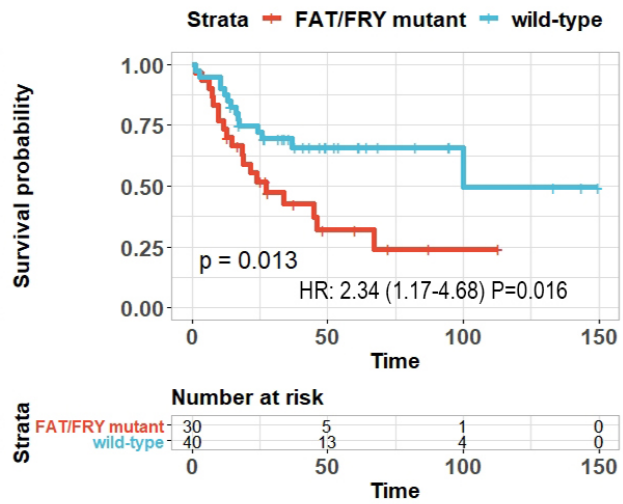

### C

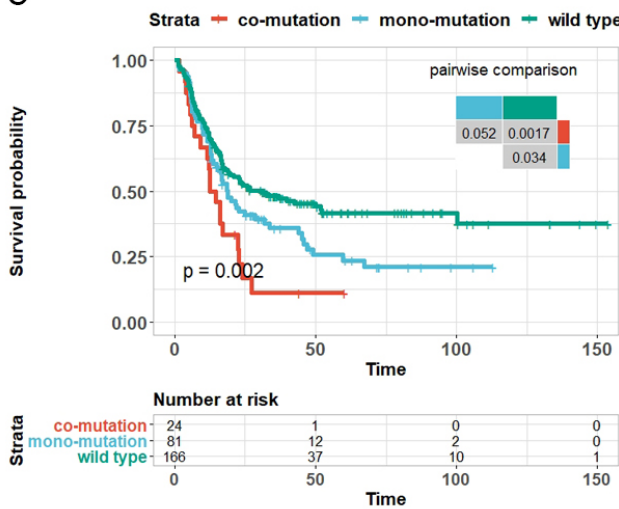

### D TCGA cohort

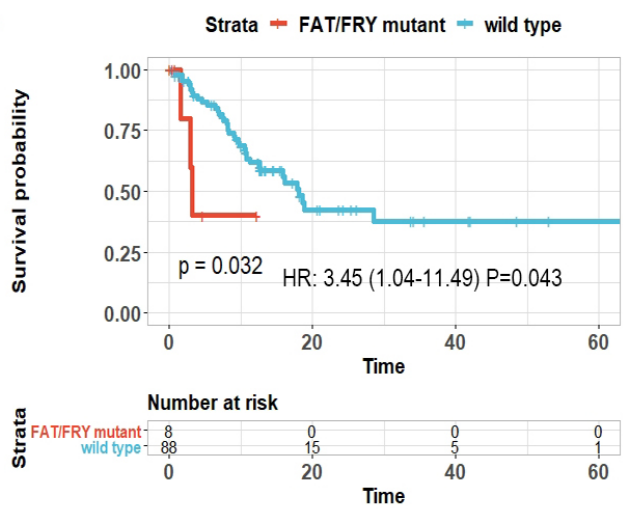

### E Pool analysis

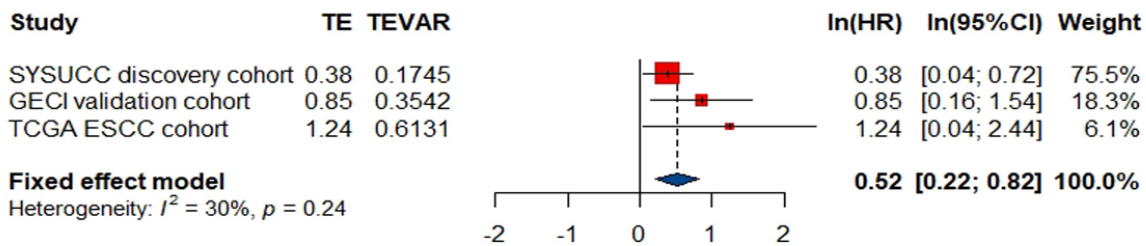

### F

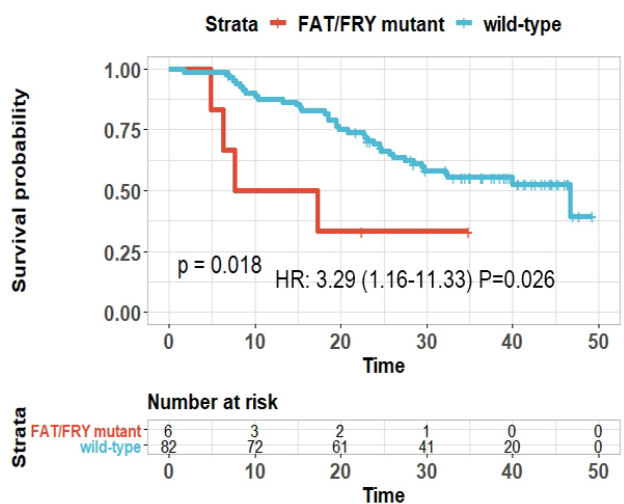

### G Lymph node positive

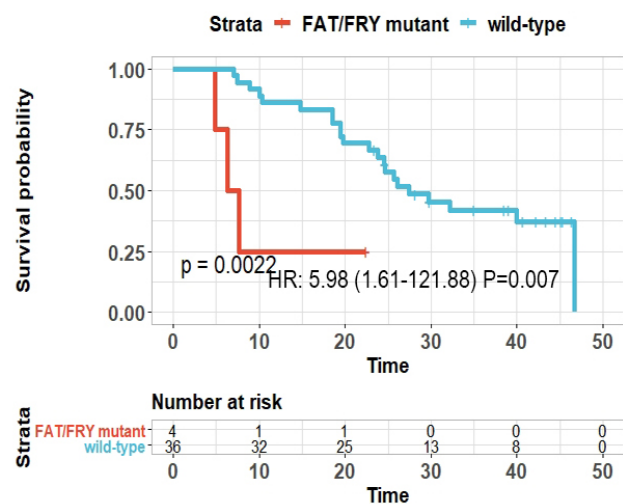

90

## Figure S5 Association of the three-gene signature with patient prognosis. (A)

91

Kaplan-Meier survival analysis showed that patients with mutation(s) in at least one mutation in genes of this signature had significantly shorter DFS than those patients with wild type genotype. (B) The prognostic value was

92

further validated in an independent validation cohort (B). (C) Survival curves showed a marginal trend that patients with two mutations in three-gene signature had worse DFS than patients with one mutations in three-signature.

93

(D) The 'FAT/FRY' subgroup had shorter progression-free survival in TCGA cohort. (E) Multivariate cox regression analysis in TCGA/ICG cohort showed that three-gene signature is associated with poor survival independent TNM

94

stage and demographic variables. In TCGA cohort, 95 patients with definitive pathological stage were included in this analysis. (F) Forest plot of hazard ratio (HR) of relapse for 367 ESCC patients in different molecular subgroups

95

from three cohorts with the fixed effects model. (pooled HR: 1.70, 95%CI: 1.27-2.93,  $I^2=38%$ ,  $P=0.2$ ). TE: effect, TEVAR: standard error of the effect. (F/G) The negative association between the three-gene signature and the

96

OS in whole patients (F) and patients with lymph node metastasis (G) in another independent dataset[6].

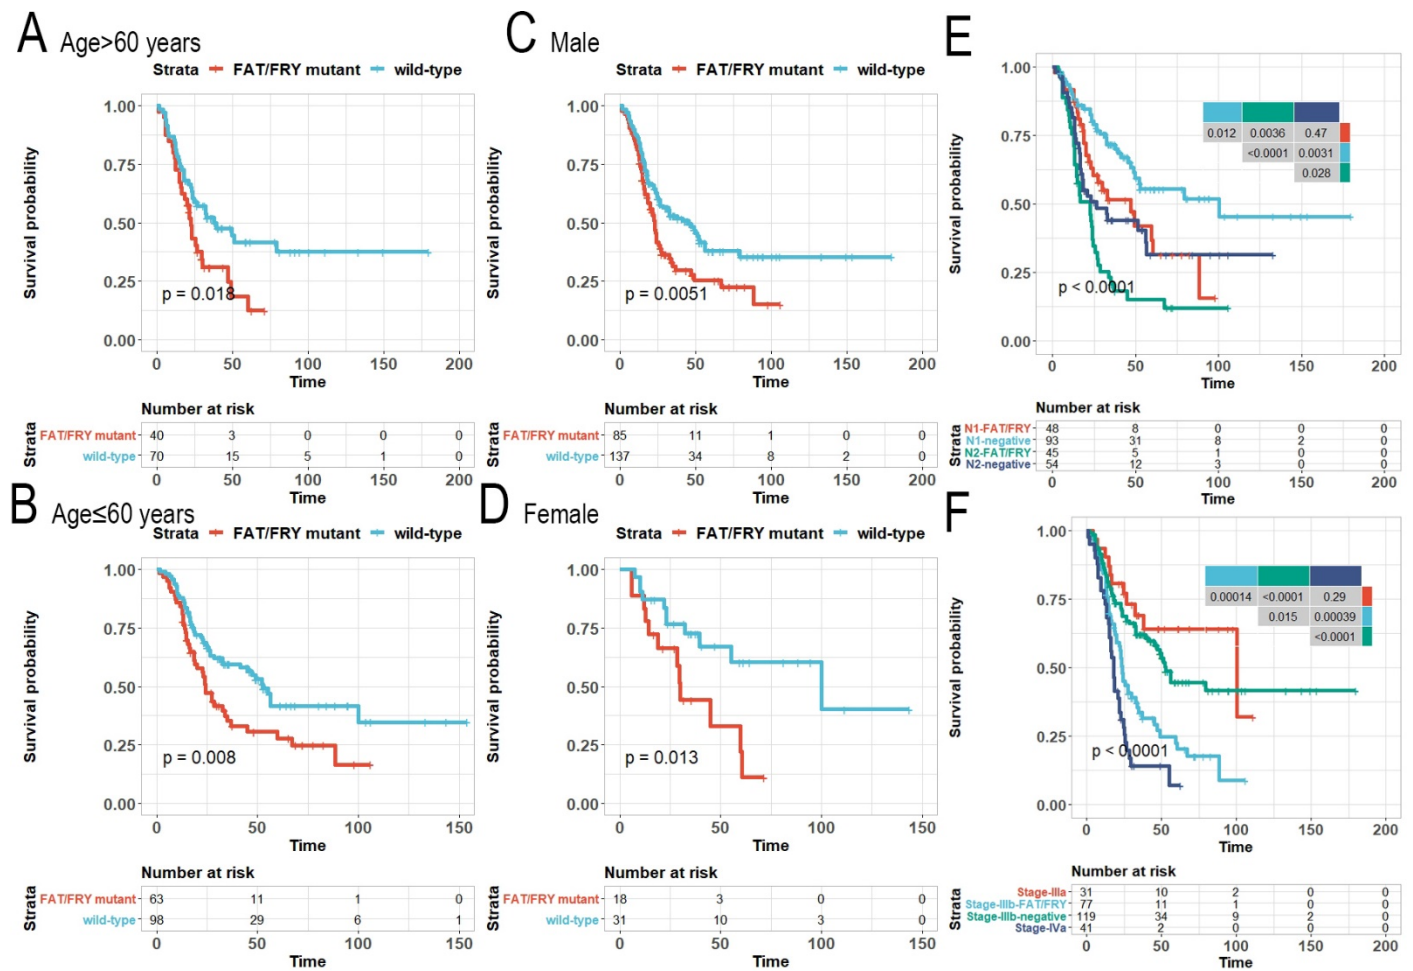

02

03

## Figure S6 Survival curves of patients according to three-gene signature

04

stratified by clinicopathological parameters. The three-gene mutation signature reflects poor

05

prognosis in different demographic subgroups. OS curves of "FAT/FRY" mutant patients and wild type patients

06

were stratified by gender (A/B), age (C/D), N stage (E) and AJCC 8<sup>th</sup> TNM stage (F). Patients in wild-type in stage

07

IIIB had similar OS with patients in stage IIIA. Patients in wild-type group in N2 stage had similar OS with patients

08

in FAT/FRY subtype in N1 stage.

09



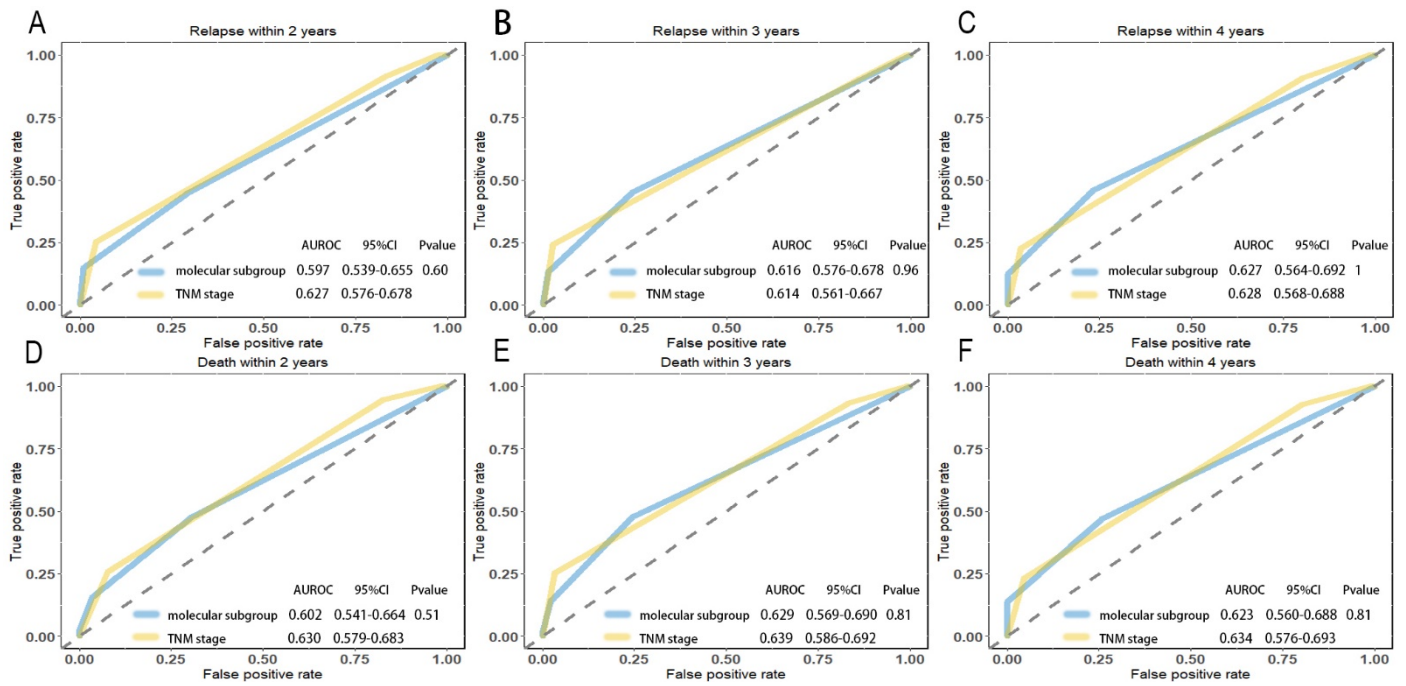

Figure S7 Comparisons of the sensitivity and specificity for prediction of disease progression and death by the three-gene signature and the TNM stage. Receiver operating characteristics (ROC) curves for relapse within 2, 3 and 4 years (a-c), and disease progression within 2, 3 and 4 years (d-f). AUROC, area under the ROC (AUROC). Area under the curve was compared using t test.

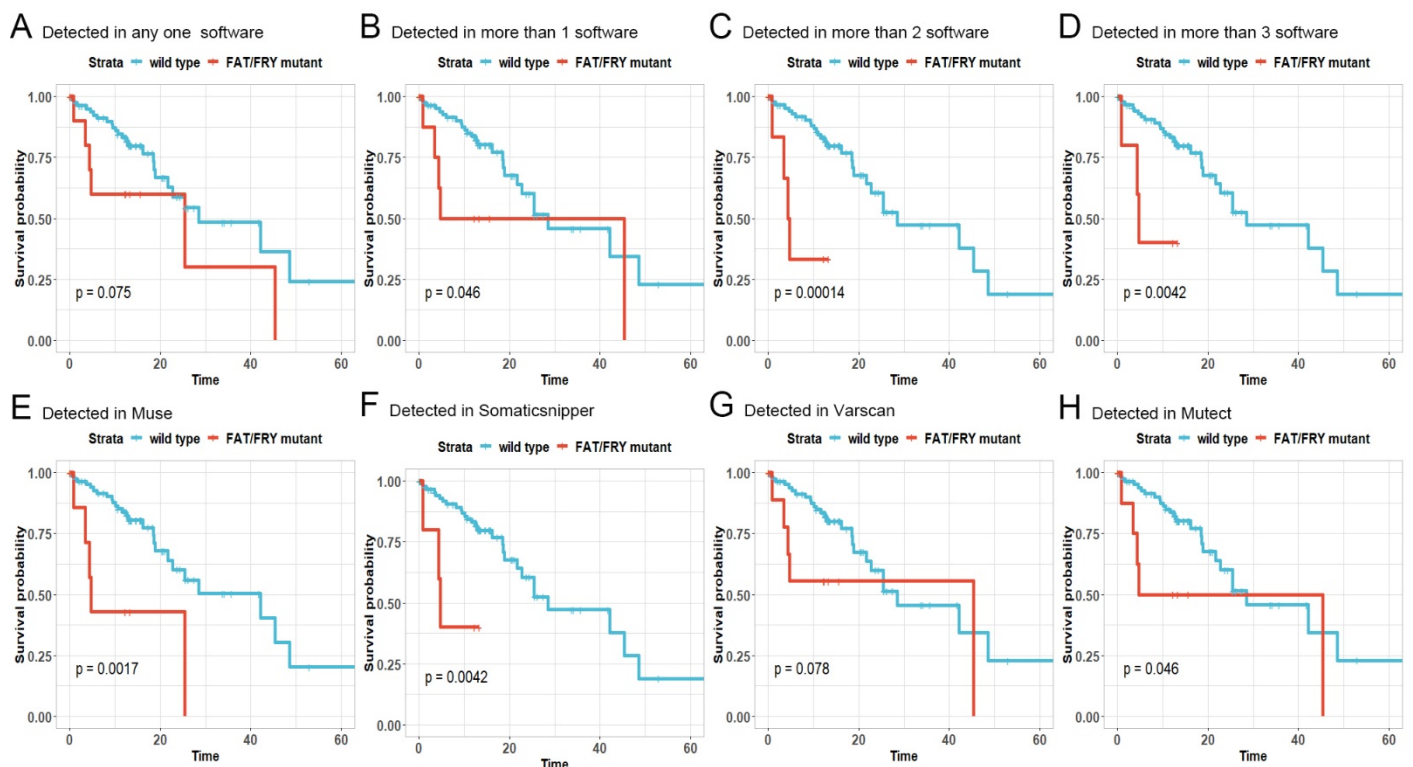

Figure S8 Prognostic value of the three-gene mutation signature detected by different methods in TCGA cohort. Patients were assigned into FAT/FRY subgroup according to their mutation status of FAT1, FAT3 and FRY.

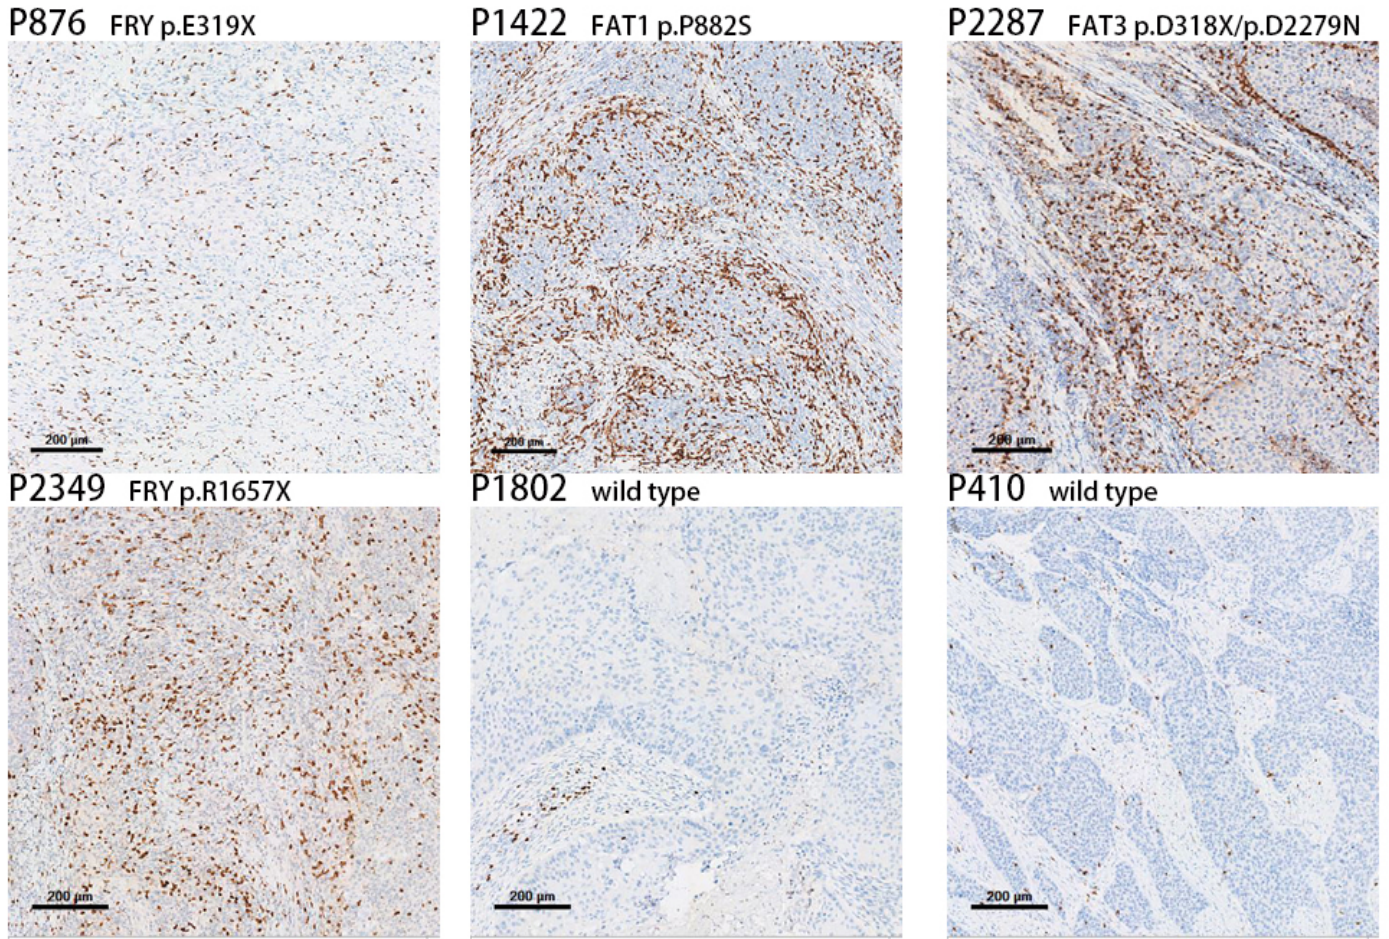

Figure S9 Representative images of CD8 immunohistochemistry of ESCC tissues from FAT/FRY mutant and wild type patients. The brown dot indicated the CD8 positive cell and the blue dot represented the nucleus.

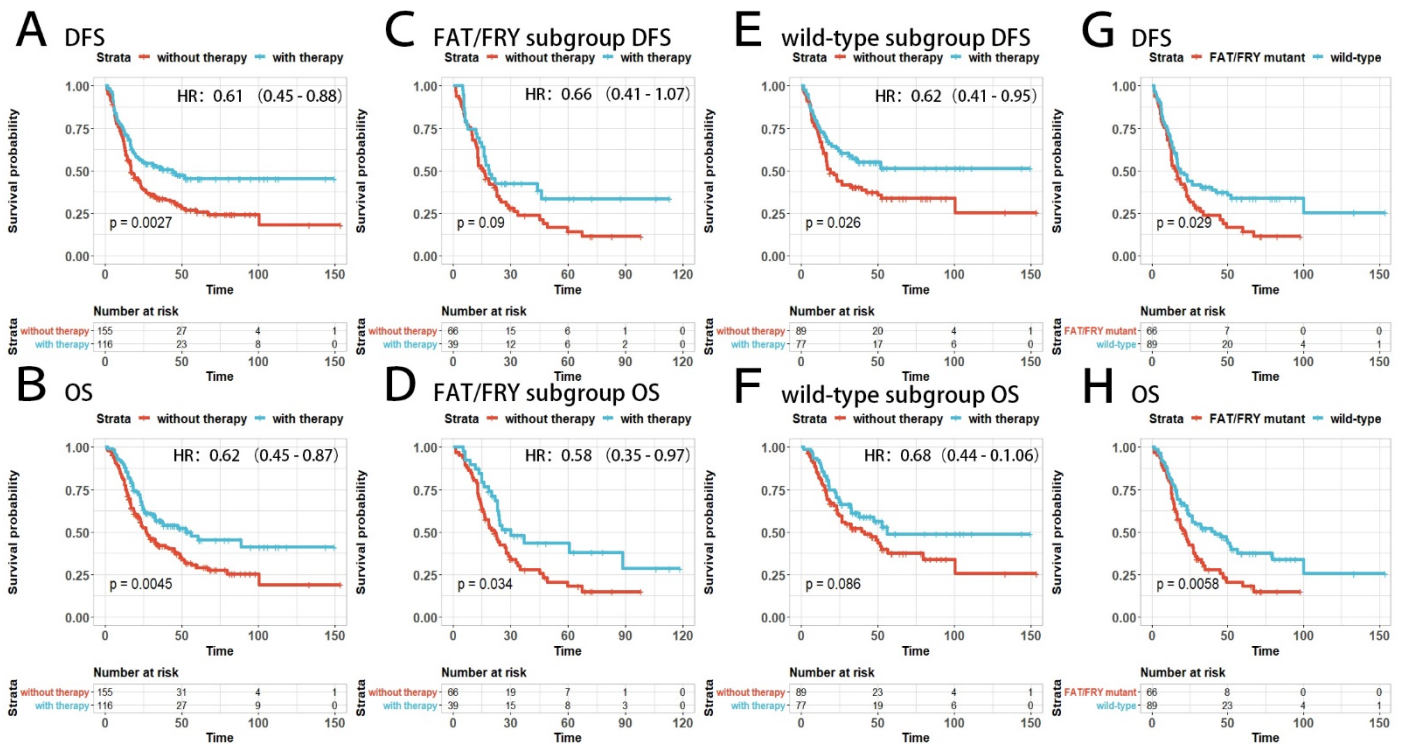

Figure S10 FAT/FRY signature is prognosticator instead of predictor of ajuvant

27 therapy. (A/B) Adjuvant therapy improved both DFS (A) and OS (B) in pN+ ESCC populations. (C-F) The  
 28 effects of adjuvant therapy did not differ between the FAT/FRY subgroup (C/D) and wild-type subgroup (E-F).  
 29 (G/H) In patients with surgery alone (without adjuvant therapy), FAT/FRY signature associated with poor DFS (G)  
 30 and OS (H).

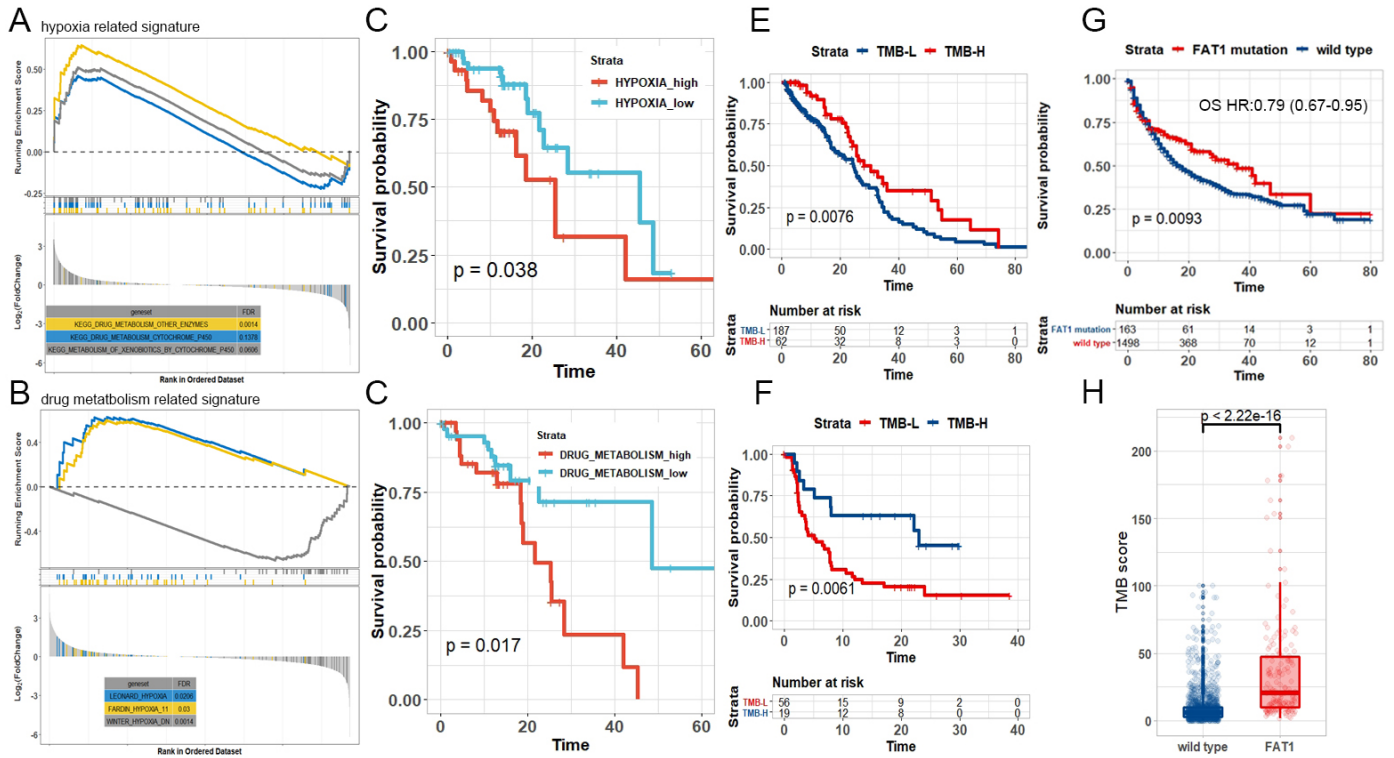

31  
 32 **Figure S11 Prognostic value of genomic and transcriptomic features of FAT/FRY**  
 33 **subgroup tumors.** (A/B) GSEA analysis revealed enrichment of hypoxia related genes (A) and drug-  
 34 metabolism related genes (B) in FAT/FRY subtype ESCC. (C/D) Survival differences of patients subdivided by  
 35 expression levels of hypoxia and drug metabolism associated signature. The red line represented patients with  
 36 high score of the signature. (E/F) Prognosis differences of TMB-H and TMB-L patients in MSS tumor cohort (e)  
 37 and NSCLC cohort (f). (G/H) As a core component of the FAT/FRY signature, FAT1 mutation was associated with  
 38 longer OS and higher TMB in patients treated with ICIs in Samstein's cohort.

40

| <b>Table S1 Detailed comparison of clinical variables between discovery cohort and independent validation cohort</b> |                                  |                                              |                |                              |
|----------------------------------------------------------------------------------------------------------------------|----------------------------------|----------------------------------------------|----------------|------------------------------|
| <b>Variables</b>                                                                                                     | <b>Discovery set(N=201) N(%)</b> | <b>Independent validation set(N=70) N(%)</b> | <b>P value</b> | <b>The entire set(N=271)</b> |
| <b>Sex</b>                                                                                                           |                                  |                                              | 0.571          |                              |
| Female                                                                                                               | 35(17.4)                         | 15(21.4)                                     |                | 50(18.5)                     |
| Male                                                                                                                 | 166(82.6)                        | 55(88.6)                                     |                | 221(81.5)                    |
| <b>Age</b>                                                                                                           |                                  |                                              | 0.854          |                              |
| < 59                                                                                                                 | 96(47.8)                         | 35(50)                                       |                | 130(48.0)                    |
| ≥60                                                                                                                  | 105(52.2)                        | 35(50)                                       |                | 141(52.0)                    |
| <b>Smoking status</b>                                                                                                |                                  |                                              | 0.631          |                              |
| Yes                                                                                                                  | 129(64.2)                        | 42(60.0)                                     |                | 171(63.1)                    |
| No                                                                                                                   | 72(35.8)                         | 28(40.0)                                     |                | 100(36.9)                    |
| <b>Alcoholism</b>                                                                                                    |                                  |                                              | 0.107          |                              |
| Yes                                                                                                                  | 99(49.3)                         | 26 (37.1)                                    |                | 125(46.1)                    |
| No                                                                                                                   | 102(50.7)                        | 44(62.9)                                     |                | 146(53.9)                    |
| <b>Differentiation</b>                                                                                               |                                  |                                              | 0.176          |                              |
| Well                                                                                                                 | 25(12.4)                         | 14(20.0)                                     |                | 39(14.4)                     |
| Moderate-poor                                                                                                        | 176(87.4)                        | 56(80.0)                                     |                | 232(85.6)                    |
| <b>Surgical approach</b>                                                                                             |                                  |                                              | 0.77           |                              |
| Left thoracotomy                                                                                                     | 66(32.8)                         | 25(35.7)                                     |                | 91(33.6)                     |
| Right thoracotomy                                                                                                    | 135(67.2)                        | 45(64.3)                                     |                | 180(66.4)                    |
| <b>Lesion location</b>                                                                                               |                                  |                                              | 0.446          |                              |
| Upper                                                                                                                | 16(8.0)                          | 3(4.3)                                       |                | 19(7.4)                      |
| Middle                                                                                                               | 115(57.2)                        | 45(64.3)                                     |                | 160(59.0)                    |
| Lower                                                                                                                | 70(34.8)                         | 22(31.4)                                     |                | 92(35.1)                     |
| <b>pT classification</b>                                                                                             |                                  |                                              | 0.669          |                              |
| T1-T2                                                                                                                | 31(15.4)                         | 13(18.6)                                     |                | 44(16.2)                     |
| T3-T4a                                                                                                               | 170(84.6)                        | 57(81.4)                                     |                | 227(83.8)                    |
| <b>pN classification</b>                                                                                             |                                  |                                              | 0.158          |                              |
| N1                                                                                                                   | 99(49.3)                         | 42(60.0)                                     |                | 141(52.0)                    |
| N2-3                                                                                                                 | 102(50.7)                        | 28(40.0)                                     |                | 130(48.0)                    |
| <b>Adjuvant chemo ± radiotherapy</b>                                                                                 |                                  |                                              |                |                              |
| Yes                                                                                                                  | 85(42.3)                         | 31(44.3)                                     | 0.88           | 116(42.8)                    |
| No                                                                                                                   | 116(57.7)                        | 39(55.7)                                     |                | 155(57.2)                    |

42

43

Table S1 Detailed comparison of clinical variables between discovery cohort and independent validation cohort

44

45

**Table S5 Multivariable Cox regression analysis of the three-gene signature and clinicopathological factors**

| <i>Variable</i>                                                         | Discovery cohort (N=201) |        | Validation cohort (N=70) |       |
|-------------------------------------------------------------------------|--------------------------|--------|--------------------------|-------|
|                                                                         | HR (95% CI)              | P      | HR (95% CI)              | P     |
| <i>Sex (male vs female)</i>                                             | 0.60 (0.36-0.99)         | 0.047  | 0.39 (0.14-1.09)         | 0.07  |
| <i>Age (≤60 vs &gt;60)</i>                                              | 0.93 (0.65-1.33)         | 0.68   | 0.73 (0.23-2.33)         | 0.60  |
| <i>pT classification</i><br><i>pT<sub>3-4</sub> VS pT<sub>1-2</sub></i> | 1.27 (0.75-2.17)         | 0.54   | 3.07 (1.04-10.45)        | 0.045 |
| <i>pN classification</i><br><i>pN<sub>2-3</sub> VS pN<sub>1</sub></i>   | 3.22 (1.97-5.28)         | <0.001 | 2.20 (0.61-4.09)         | 0.14  |
| <i>Differentiation</i><br><i>pG<sub>3</sub> VS pG<sub>1-2</sub></i>     | 0.85 (0.51-1.43)         | 0.54   | 1.58 (0.61-4.09)         | 0.35  |
| <i>Number of lymph nodes examined</i><br><i>(≤27 vs &gt;27)</i>         | 1.31 (0.92-1.88)         | 0.14   | 1.63 (0.78-3.37)         | 0.20  |
| <i>Prognostic subtype</i><br><i>(FAT/FRY vs wild type)</i>              | 1.47 (1.04-2.09)         | 0.028  | 2.82 (1.28-6.22)         | 0.01  |
| <i>Adjuvant chemo ± radiotherapy</i><br><i>(Yes vs No)</i>              | 0.67 (0.46-0.97)         | 0.035  | 0.33 (0.15-0.72)         | 0.006 |

46

47 Table S5 Multivariable Cox regression analysis of the three-gene signature and  
48 clinicopathological factors

49

**Table S6 Detailed comparison of clinical variables between "FAT/FRY" group and wild type group across the 271 ESCC patients**

| Variables          | FAT/FRY (N=105) | wild-type (N=166) | P    | Overall (N=271) |
|--------------------|-----------------|-------------------|------|-----------------|
| Age                |                 |                   | 0.85 |                 |
| ≤60                | 53 (50.4)       | 87 (52.4)         |      | 140 (51.6)      |
| > 60               | 52 (49.6)       | 79 (47.6)         |      | 131 (48.4)      |
| Sex                |                 |                   | 0.97 |                 |
| Female             | 19 (18.5)       | 31 (18.7)         |      | 50 (18.5)       |
| Male               | 86 (71.5)       | 135 (71.3)        |      | 221 (81.5)      |
| T stage            |                 |                   | 0.85 |                 |
| T1                 | 7 ( 6.7)        | 12 ( 7.7)         |      | 19 ( 7.0)       |
| T2                 | 32 (30.5)       | 48 (28.9)         |      | 80 (29.5)       |
| T3                 | 57 (54.3)       | 96 (57.8)         |      | 153 (56.5)      |
| T4                 | 9 ( 8.6)        | 10 ( 6.0)         |      | 19 ( 7.0)       |
| N stage            |                 |                   | 0.16 |                 |
| N1                 | 48 (45.7)       | 91 (54.8)         |      | 139 (51.3)      |
| N2                 | 47 (44.8)       | 55 (33.1)         |      | 102 (37.6)      |
| N3                 | 10 (9.5)        | 20 (12.0)         |      | 30 (11.1)       |
| Surgical procedure |                 |                   | 0.93 |                 |
| Right thoracotomy  | 70 (68.0)       | 112 (66.7)        |      | 180 (65.7)      |
| Left thoracotomy   | 33 (32.0)       | 56 (33.3)         |      | 91 (34.3)       |
| Differentiation    |                 |                   | 0.84 |                 |
| G2-3               | 87 (82.9)       | 145 (87.3)        |      | 232 (85.6)      |
| G1                 | 18 (17.1)       | 21 (12.7)         |      | 39 (14.4)       |
| smoking status     |                 |                   | 1    |                 |
| Yes                | 66 (62.8)       | 105 (63.3)        |      | 171 (63.1)      |
| No                 | 39 (37.1)       | 61 (36.7)         |      | 100 (36.9)      |
| alcoholism = 1 (%) |                 |                   | 0.31 |                 |
| Yes                | 53 (50.5)       | 72 (43.4)         |      | 125 (46.1)      |
| No                 | 52 (49.5)       | 94 (56.6)         |      | 146 (53.9)      |
| position (%)       |                 |                   | 0.10 |                 |
| Upper              | 3 ( 2.9)        | 16 (9.6)          |      | 19 ( 7.4)       |
| Middle             | 66 (62.9)       | 94 (56.6)         |      | 160 (59.0)      |
| Lower              | 36 (34.3)       | 56 (33.7)         |      | 92 (33.9)       |
| Adjuvant therapy   |                 |                   | 0.16 |                 |
| Yes                | 39 (37.1)       | 77 (46.4)         |      | 116 (42.8)      |
| No                 | 66 (62.9)       | 89 (53.6)         |      | 155 (57.2)      |

50 Table S6 Detailed comparison of clinical variables between "FAT/FRY" group  
51 and wild type group across the 271 ESCC patients

52  
53  
54

| Signature Name                     | Resource                                         | Supplimentary reference                                               |
|------------------------------------|--------------------------------------------------|-----------------------------------------------------------------------|
| CD 8 T cells                       | Charoentong et al. Cell Rep 2017;18:248-262.     | [41]                                                                  |
| Eosinophils                        | Charoentong et al. Cell Rep 2017;18:248-262.     | [41]                                                                  |
| Gamma delta T cells                | Charoentong et al. Cell Rep 2017;18:248-262.     | [41]                                                                  |
| Activated dendritic cells          | Charoentong et al. Cell Rep 2017;18:248-262.     | [41]                                                                  |
| IFN gamma signature                | Ayers M, et al. J Clin Invest 2017;127:2930-2940 | [53]                                                                  |
| GO BP Hippo signaling              | MsigDB                                           | <a href="http://www.gsea-msigdb.org/">http://www.gsea-msigdb.org/</a> |
| LEONARD_HYPOXIA                    | MsigDB                                           | <a href="http://www.gsea-msigdb.org/">http://www.gsea-msigdb.org/</a> |
| LEONARD_HYPOXIA                    | MsigDB                                           | <a href="http://www.gsea-msigdb.org/">http://www.gsea-msigdb.org/</a> |
| FARDIN_HYPOXIA                     | MsigDB                                           | <a href="http://www.gsea-msigdb.org/">http://www.gsea-msigdb.org/</a> |
| WINTER_HYPOXIA_DN                  | MsigDB                                           | <a href="http://www.gsea-msigdb.org/">http://www.gsea-msigdb.org/</a> |
| KEGG_DRUG_METABOLISM_OTHER_ENZYMES | MsigDB                                           | <a href="http://www.gsea-msigdb.org/">http://www.gsea-msigdb.org/</a> |
| KEGG_DRUG_METABOLISM_CYP450        | MsigDB                                           | <a href="http://www.gsea-msigdb.org/">http://www.gsea-msigdb.org/</a> |
| KEGG_DRUG_XENOBIOTICS_CYP450       | MsigDB                                           | <a href="http://www.gsea-msigdb.org/">http://www.gsea-msigdb.org/</a> |

55

### Table S8 Publicly-available gene signatures used in the study

|               |                           |
|---------------|---------------------------|
| CTGF former   | CTCGCGGCTTACCGACTG        |
| CTGF reverse  | GGCTCTGCTTCTCTAGCCTG      |
| CYR61 former  | GTTTGGCCCAGACCCAACTA      |
| CYR61 reverse | GGCTCTGCTTCTCTAGCCTG      |
| LATS2 former  | CAGGATGCGACCAGGAGATG      |
| LATS2 reverse | CAGGATGCGACCAGGAGATG      |
| FAT1 former   | TTCAAAATAGGTGAAGAGACAGGTG |
| FAT1 reverse  | TTCAAAATAGGTGAAGAGACAGGTG |

56

### Table S11 Primers used in our qRT-PCR experiment.

57

1. Liu J, Lichtenberg T, Hoadley KA et al. An Integrated TCGA Pan-Cancer Clinical Data Resource to Drive High-Quality Survival Outcome Analytics, Cell 2018;173:400-416 e411.

58

59

2. Dai W, Ko JMY, Choi SSA et al. Whole-exome sequencing reveals critical genes underlying metastasis in oesophageal squamous cell carcinoma, J Pathol 2017;242:500-510.

60

61

3. Sawada G, Niida A, Uchi R et al. Genomic Landscape of Esophageal Squamous Cell Carcinoma in a Japanese Population, Gastroenterology 2016;150:1171-1182.

62

- 63 4. Qin HD, Liao XY, Chen YB et al. Genomic Characterization of Esophageal Squamous Cell Carcinoma Reveals Critical  
64 Genes Underlying Tumorigenesis and Poor Prognosis, *Am J Hum Genet* 2016;98:709-727.
- 65 5. Zhang L, Zhou Y, Cheng C et al. Genomic analyses reveal mutational signatures and frequently altered genes in  
66 esophageal squamous cell carcinoma, *Am J Hum Genet* 2015;96:597-611.
- 67 6. Song Y, Li L, Ou Y et al. Identification of genomic alterations in oesophageal squamous cell cancer, *Nature* 2014;509:91-  
68 95.
- 69 7. Lin DC, Hao JJ, Nagata Y et al. Genomic and molecular characterization of esophageal squamous cell carcinoma, *Nat*  
70 *Genet* 2014;46:467-473.
- 71 8. Gao YB, Chen ZL, Li JG et al. Genetic landscape of esophageal squamous cell carcinoma, *Nat Genet* 2014;46:1097-  
72 1102.
- 73 9. Agrawal N, Jiao Y, Bettgowda C et al. Comparative genomic analysis of esophageal adenocarcinoma and squamous  
74 cell carcinoma, *Cancer Discov* 2012;2:899-905.
- 75 10. Li H, Durbin R. Fast and accurate short read alignment with Burrows-Wheeler transform, *Bioinformatics* 2009;25:1754-  
76 1760.
- 77 11. Faust GG, Hall IM. SAMBLASTER: fast duplicate marking and structural variant read extraction, *Bioinformatics*  
78 2014;30:2503-2505.
- 79 12. Cibulskis K, Lawrence MS, Carter SL et al. Sensitive detection of somatic point mutations in impure and heterogeneous  
80 cancer samples, *Nat Biotechnol* 2013;31:213-219.
- 81 13. Wang K, Li M, Hakonarson H. ANNOVAR: functional annotation of genetic variants from high-throughput sequencing  
82 data, *Nucleic Acids Res* 2010;38:e164.
- 83 14. Forbes SA, Bindal N, Bamford S et al. COSMIC: mining complete cancer genomes in the Catalogue of Somatic Mutations  
84 in Cancer, *Nucleic Acids Res* 2011;39:D945-950.
- 85 15. Lek M, Karczewski KJ, Minikel EV et al. Analysis of protein-coding genetic variation in 60,706 humans, *Nature*  
86 2016;536:285-291.
- 87 16. Tamborero D, Gonzalez-Perez A, Lopez-Bigas N. OncodriveCLUST: exploiting the positional clustering of somatic  
88 mutations to identify cancer genes, *Bioinformatics* 2013;29:2238-2244.
- 89 17. Vaser R, Adusumalli S, Leng SN et al. SIFT missense predictions for genomes, *Nat Protoc* 2016;11:1-9.
- 90 18. Wagner A. Rapid detection of positive selection in genes and genomes through variation clusters, *Genetics*  
91 2007;176:2451-2463.
- 92 19. Chang MT, Asthana S, Gao SP et al. Identifying recurrent mutations in cancer reveals widespread lineage diversity and  
93 mutational specificity, *Nat Biotechnol* 2016;34:155-163.
- 94 20. Nadeu F, Delgado J, Royo C et al. Clinical impact of clonal and subclonal TP53, SF3B1, BIRC3, NOTCH1, and ATM  
95 mutations in chronic lymphocytic leukemia, *Blood* 2016;127:2122-2130.
- 96 21. Rossi D, Khiabani H, Spina V et al. Clinical impact of small TP53 mutated subclones in chronic lymphocytic leukemia,  
97 *Blood* 2014;123:2139-2147.
- 98 22. Talevich E, Shain AH, Botton T et al. CNVkit: Genome-Wide Copy Number Detection and Visualization from Targeted  
99 DNA Sequencing, *PLoS Comput Biol* 2016;12:e1004873.
- 00 23. Papaemmanuil E, Gerstung M, Malcovati L et al. Clinical and biological implications of driver mutations in  
01 myelodysplastic syndromes, *Blood* 2013;122:3616-3627; quiz 3699.
- 02 24. Papaemmanuil E, Gerstung M, Bullinger L et al. Genomic Classification and Prognosis in Acute Myeloid Leukemia, *N*  
03 *Engl J Med* 2016;374:2209-2221.
- 04 25. Yan T, Cui H, Zhou Y et al. Multi-region sequencing unveils novel actionable targets and spatial heterogeneity in  
05 esophageal squamous cell carcinoma, *Nat Commun* 2019;10:1670.
- 06 26. Sondka Z, Bamford S, Cole CG et al. The COSMIC Cancer Gene Census: describing genetic dysfunction across all human  
07 cancers, *Nat Rev Cancer* 2018;18:696-705.
- 08 27. Vogelstein B, Papadopoulos N, Velculescu VE et al. Cancer genome landscapes, *Science* 2013;339:1546-1558.
- 09 28. Kandoth C, McLellan MD, Vandin F et al. Mutational landscape and significance across 12 major cancer types, *Nature*  
10 2013;502:333-339.
- 11 29. Tamborero D, Gonzalez-Perez A, Perez-Llamas C et al. Comprehensive identification of mutational cancer driver genes



- across 12 tumor types, *Sci Rep* 2013;3:2650.
30. Patel BJ, Przychodzen B, Thota S et al. Genomic determinants of chronic myelomonocytic leukemia, *Leukemia* 2017;31:2815-2823.
31. Nik-Zainal S, Van Loo P, Wedge DC et al. The life history of 21 breast cancers, *Cell* 2012;149:994-1007.
32. Augustin T. Bradley-Terry-Luce models to incorporate within-pair order effects: representation and uniqueness theorems, *Br J Math Stat Psychol* 2004;57:281-294.
33. Landau DA, Carter SL, Stojanov P et al. Evolution and impact of subclonal mutations in chronic lymphocytic leukemia, *Cell* 2013;152:714-726.
34. Landau DA, Tausch E, Taylor-Weiner AN et al. Mutations driving CLL and their evolution in progression and relapse, *Nature* 2015;526:525-530.
35. Dentr SC. Principles of reconstructing the subclonal architecture of cancers.
36. Brunet J-P. Metagenes and molecular pattern discovery using matrix factorization, *pnas* 2004.
37. Wilkerson MD, Hayes DN. ConsensusClusterPlus: a class discovery tool with confidence assessments and item tracking, *Bioinformatics* 2010;26:1572-1573.
38. Paola Sebastiani ISK, Marco F. Ramoni. Consensus Clustering: A Resampling-Based Method for Class Discovery and Visualization of Gene Expression Microarray Data 2003.
39. Cancer Genome Atlas Research N. Integrated genomic characterization of oesophageal carcinoma, *Nature* 2017;541:169-175.
40. Love MI, Huber W, Anders S. Moderated estimation of fold change and dispersion for RNA-seq data with DESeq2, *Genome Biol* 2014;15:550.
41. Charoentong P, Finotello F, Angelova M et al. Pan-cancer Immunogenomic Analyses Reveal Genotype-Immunophenotype Relationships and Predictors of Response to Checkpoint Blockade, *Cell Rep* 2017;18:248-262.
42. Lee E, Chuang HY, Kim JW et al. Inferring pathway activity toward precise disease classification, *PLoS Comput Biol* 2008;4:e1000217.
43. Bindea G, Mlecnik B, Tosolini M et al. Spatiotemporal dynamics of intratumoral immune cells reveal the immune landscape in human cancer, *Immunity* 2013;39:782-795.
44. Chen PL, Roh W, Reuben A et al. Analysis of Immune Signatures in Longitudinal Tumor Samples Yields Insight into Biomarkers of Response and Mechanisms of Resistance to Immune Checkpoint Blockade, *Cancer Discov* 2016;6:827-837.
45. Hugo W, Zaretsky JM, Sun L et al. Genomic and Transcriptomic Features of Response to Anti-PD-1 Therapy in Metastatic Melanoma, *Cell* 2016;165:35-44.
46. Snyder A, Nathanson T, Funt SA et al. Contribution of systemic and somatic factors to clinical response and resistance to PD-L1 blockade in urothelial cancer: An exploratory multi-omic analysis, *PLoS Med* 2017;14:e1002309.
47. Samstein RM, Lee CH, Shoushtari AN et al. Tumor mutational load predicts survival after immunotherapy across multiple cancer types, *Nat Genet* 2019;51:202-206.
48. Miao D, Margolis CA, Vokes NI et al. Genomic correlates of response to immune checkpoint blockade in microsatellite-stable solid tumors, *Nat Genet* 2018;50:1271-1281.
49. Hellmann MD, Nathanson T, Rizvi H et al. Genomic Features of Response to Combination Immunotherapy in Patients with Advanced Non-Small-Cell Lung Cancer, *Cancer Cell* 2018;33:843-852 e844.
50. Cui Y, Chen H, Xi R et al. Whole-genome sequencing of 508 patients identifies key molecular features associated with poor prognosis in esophageal squamous cell carcinoma, *Cell Res* 2020.
51. Cancer Genome Atlas Research N, Analysis Working Group: Asan U, Agency BCC et al. Integrated genomic characterization of oesophageal carcinoma, *Nature* 2017;541:169-175.
52. Yang W, Soares J, Greninger P et al. Genomics of Drug Sensitivity in Cancer (GDSC): a resource for therapeutic biomarker discovery in cancer cells, *Nucleic Acids Res* 2013;41:D955-961.
53. Ayers M, Lunceford J, Nebozhyn M et al. IFN-gamma-related mRNA profile predicts clinical response to PD-1 blockade, *J Clin Invest* 2017;127:2930-2940.
